# Supplementary material
Source: PubMed Central journal article supplement (PMC10405779)
Supplement: NIHMS1917209-supplement-Supplemental_Overview.pdf [file NIHMS1917209-supplement-Supplemental_Overview.pdf]

**Supplementary information**

---

**Integrated multi-omic characterization of congenital heart disease**

---

In the format provided by the authors and unedited

## ***SI Guide***

**Supplementary Table 1:** Patient sample information. Table contains sample information, and highlights which samples were used for snRNA-seq, PCM1 ATAC-seq, NK and/or CD14 ATAC-seq, PBMC scRNA-seq, IMC and histology.

**Supplementary Table 2:** Table with patient clinical information and metadata.

**Supplementary Table 3:** Differentially expressed marker genes for cardiac snRNA-seq. Related to Fig. 1b.

**Supplementary Table 4:** Venn diagram results from pseudo-bulk RNA-seq analysis of cardiac snRNA-seq data. Intersections are between genes differentially expressed by CHD diagnosis versus donor. Related to Extended Data Fig. 2f.

**Supplementary Table 5:** Differential gene expression for cardiomyocyte subclusters. Related to Fig. 2.

**Supplementary Table 6:** Venn diagram results from intersection of snRNA-seq and cardiomyocyte-specific ATAC-seq. Related to Fig. 2 and Extended Data Fig. 3f.

**Supplementary Table 7:** Differential gene expression for cardiac fibroblast subclusters. Related to Fig. 3.

**Supplementary Table 8:** Differential gene expression for endothelial cell subclusters. Related to Extended Data Fig. 5.

**Supplementary Table 9:** Differential gene expression for cardiac immune cell subclusters. Related to Fig. 6.

**Supplementary Table 10:** Differential gene expression for all PBMC clusters. Related to Extended Data Fig. 8b.

**Supplementary Table 11:** Differential gene expression for all myeloid clusters. Related to Extended Data Fig. 8h.

**Supplementary Table 12:** Differential gene expression for all NK cell clusters. Related to Extended Data Fig. 8k.

**Supplementary Table 13:** Differential chromatin accessibility analysis comparing NK and CD14 cell populations. Related to Extended Data Fig. 9b.

**Supplementary Table 14:** List of all the cytokines profiled that were co-expressed in PBMCs. Related to Extended Data Fig. 9d.

**Supplementary Table 15:** List of all the receptors expressed in cardiac cells that can bind to profiled cytokines found in patient serum. Related to Extended Data Fig. 9e.

**Supplementary Table 16:** Ligand-receptor pair data for cardiac cells and cytokine profiles of CHD serum. Related to Extended Data Fig. 9f.

**Supplementary Table 17:** Cardiac snRNA-seq quality control data.

**Supplementary Table 18:** All antibodies used in this study for IMC, and immunofluorescence, as well as all of the RNAScope probes used.
